# Supplementary material for: Intrinsic Subtypes and Gene Expression Profiles in Primary and Metastatic Breast Cancer
Source: Oxford University Press journal article supplement (doi:10.1158/0008-5472.can-16-2717), 2017-03-01
Supplement: 00085472can162717-sup-172614_1_supp_3813123_8jdm88.docx [file 00085472can162717-sup-172614_1_supp_3813123_8jdm88.docx]

**Table S2.** Clinical characteristics of the cohort

|  | **n (%)** | |
| --- | --- | --- |
| **n** | 123 (100) | |
| **Age, median (range)** | 52.5 (28 - 90) | |
|  | **PT** | **MT** |
| **HER2 status** |  |  |
| Positive | 19 (15.4) | 24 (19.5) |
| Negative | 100 (81.3) | 97 (78.9) |
| Unknown | 4 (3.3) | 2 (1.6) |
| **ER status** |  |  |
| Positive | 99 (80.5) | 101 (82.1) |
| Negative | 22 (17.9) | 20 (16.3) |
| Unknown | 2 (1.6) | 2 (1.6) |
| **PR status** |  |  |
| Positive | 92 (74.8) | 74 (60.2) |
| Negative | 29 (23.6) | 48 (39.0) |
| Unknown | 2 (1.6) | 1 (0.8) |
